# Supplementary material
Source: publisher figshare collection journal article supplement (https://acs.figshare.com/ndownloader/files/23559812)

## Supporting Information

### Identification of Bioisosteric Substituents by Deep Neural Network

Peter Ertl

peter.ertl@novartis.com  
www.peter-ertl.com

#### Snippet of the Python code showing the network architecture and the parameters used when training the model:

```
model = tf.keras.Sequential()
model.add(layers.Dense(10000,activation='relu'))
model.add(layers.Dense(10000,activation='relu'))
model.add(layers.Dense(ncy,activation='sigmoid'))

model.compile(optimizer=tf.keras.optimizers.Adam(0.01),loss='binary_crossentropy',metrics=['accuracy'])

model.fit(X,Y,epochs=30,batch_size=500,validation_split=0.2,verbose=2)

(X and Y are data matrices as described in the main text, ncy is the y
dimension of the Y matrix)
```

#### Comparison of 4 methods to identify bioisosteric analogs.

In the following figures the analogs of 4 simple substituents identified by 4 different search strategies are shown. Every figure consists of 4 parts corresponding to different search methods: top left - deep neural network (the method described in this article), top right - similarity in molecular physicochemical properties, bottom left - classical fingerprint similarity, bottom right - a null model described in details in the text of the article. One can compare these results also with the Figure 2 in the article where the bioisosteres of these 4 substituents extracted from medicinal chemistry literature are shown.

|                       |                       |                          |                            |                        |                            |                            |                            |
|-----------------------|-----------------------|--------------------------|----------------------------|------------------------|----------------------------|----------------------------|----------------------------|
| <chem>R#N</chem>      | <chem>R(F)(F)F</chem> | <chem>RO</chem>          | <chem>RBr</chem>           | <chem>R#N</chem>       | <chem>RC(=O)C</chem>       | <chem>RC(=O)OCC</chem>     | <chem>RC(=O)OC</chem>      |
| <chem>RCl</chem>      | <chem>RF</chem>       | <chem>R</chem>           | <chem>RC(=O)O</chem>       | <chem>RCH2NO2</chem>   | <chem>RC(=O)CO</chem>      | <chem>RC1=CN(C)C=C1</chem> | <chem>RC1=NC=NC=C1</chem>  |
| <chem>RCHO</chem>     | <chem>RN(=O)=O</chem> | <chem>RC(=O)OC</chem>    | <chem>RO</chem>            | <chem>RC(F)(F)F</chem> | <chem>RC(=O)CF</chem>      | <chem>RC(=O)CN(C)C</chem>  | <chem>RC1=NC=NC=C1</chem>  |
| <chem>RC(=O)C</chem>  | <chem>RNH2</chem>     | <chem>RS(=O)(=O)C</chem> | <chem>c1ccccc1R</chem>     | <chem>R#N#N</chem>     | <chem>RC(=O)O</chem>       | <chem>RF</chem>            | <chem>RC1=NC=CC=C1S</chem> |
| <chem>R#N</chem>      | <chem>RCH2CN</chem>   | <chem>RNC#N</chem>       | <chem>R#C#C</chem>         | <chem>R#N</chem>       | <chem>R</chem>             | <chem>RCH2CH2</chem>       | <chem>RO</chem>            |
| <chem>RC(C)C#N</chem> | <chem>RN(C)C#N</chem> | <chem>RCH=CHC#N</chem>   | <chem>RCH2CH2C#N</chem>    | <chem>RNH2</chem>      | <chem>RCH2CN</chem>        | <chem>RCH2CH2OH</chem>     | <chem>RS</chem>            |
| <chem>RNC#N</chem>    | <chem>RCH2SC#N</chem> | <chem>RSCH2C#N</chem>    | <chem>CC(C)(C)C#N</chem>   | <chem>RCH=CH</chem>    | <chem>RCH2CH2</chem>       | <chem>RSCH2C(=O)N</chem>   | <chem>RS</chem>            |
| <chem>ROCH2C#N</chem> | <chem>R#C#C</chem>    | <chem>RC(=O)CC#N</chem>  | <chem>R[C@H]1CC1C#N</chem> | <chem>RNC#N</chem>     | <chem>RSCH2c1ccccc1</chem> | <chem>R[C@H]1CC1C#N</chem> | <chem>RC#CC(=O)OC</chem>   |

|  |  |  |  |  |  |  |  |
|--|--|--|--|--|--|--|--|
|  |  |  |  |  |  |  |  |
|  |  |  |  |  |  |  |  |
|  |  |  |  |  |  |  |  |
|  |  |  |  |  |  |  |  |
|  |  |  |  |  |  |  |  |
|  |  |  |  |  |  |  |  |
|  |  |  |  |  |  |  |  |
|  |  |  |  |  |  |  |  |

|  |  |  |  |  |  |  |  |
|--|--|--|--|--|--|--|--|
|  |  |  |  |  |  |  |  |
|  |  |  |  |  |  |  |  |
|  |  |  |  |  |  |  |  |
|  |  |  |  |  |  |  |  |
|  |  |  |  |  |  |  |  |
|  |  |  |  |  |  |  |  |
|  |  |  |  |  |  |  |  |
|  |  |  |  |  |  |  |  |
|  |  |  |  |  |  |  |  |
|  |  |  |  |  |  |  |  |
|  |  |  |  |  |  |  |  |
|  |  |  |  |  |  |  |  |
|  |  |  |  |  |  |  |  |
|  |  |  |  |  |  |  |  |
|  |  |  |  |  |  |  |  |
|  |  |  |  |  |  |  |  |
|  |  |  |  |  |  |  |  |
|  |  |  |  |  |  |  |  |
|  |  |  |  |  |  |  |  |
|  |  |  |  |  |  |  |  |
|  |  |  |  |  |  |  |  |
|  |  |  |  |  |  |  |  |
|  |  |  |  |  |  |  |  |
|  |  |  |  |  |  |  |  |
|  |  |  |  |  |  |  |  |
|  |  |  |  |  |  |  |  |
|  |  |  |  |  |  |  |  |
|  |  |  |  |  |  |  |  |
|  |  |  |  |  |  |  |  |
|  |  |  |  |  |  |  |  |
|  |  |  |  |  |  |  |  |
|  |  |  |  |  |  |  |  |
|  |  |  |  |  |  |  |  |
|  |  |  |  |  |  |  |  |
|  |  |  |  |  |  |  |  |
|  |  |  |  |  |  |  |  |
|  |  |  |  |  |  |  |  |
|  |  |  |  |  |  |  |  |
|  |  |  |  |  |  |  |  |
|  |  |  |  |  |  |  |  |
|  |  |  |  |  |  |  |  |
|  |  |  |  |  |  |  |  |
|  |  |  |  |  |  |  |  |
|  |  |  |  |  |  |  |  |
|  |  |  |  |  |  |  |  |
|  |  |  |  |  |  |  |  |
|  |  |  |  |  |  |  |  |
|  |  |  |  |  |  |  |  |
|  |  |  |  |  |  |  |  |
|  |  |  |  |  |  |  |  |
|  |  |  |  |  |  |  |  |
|  |  |  |  |  |  |  |  |

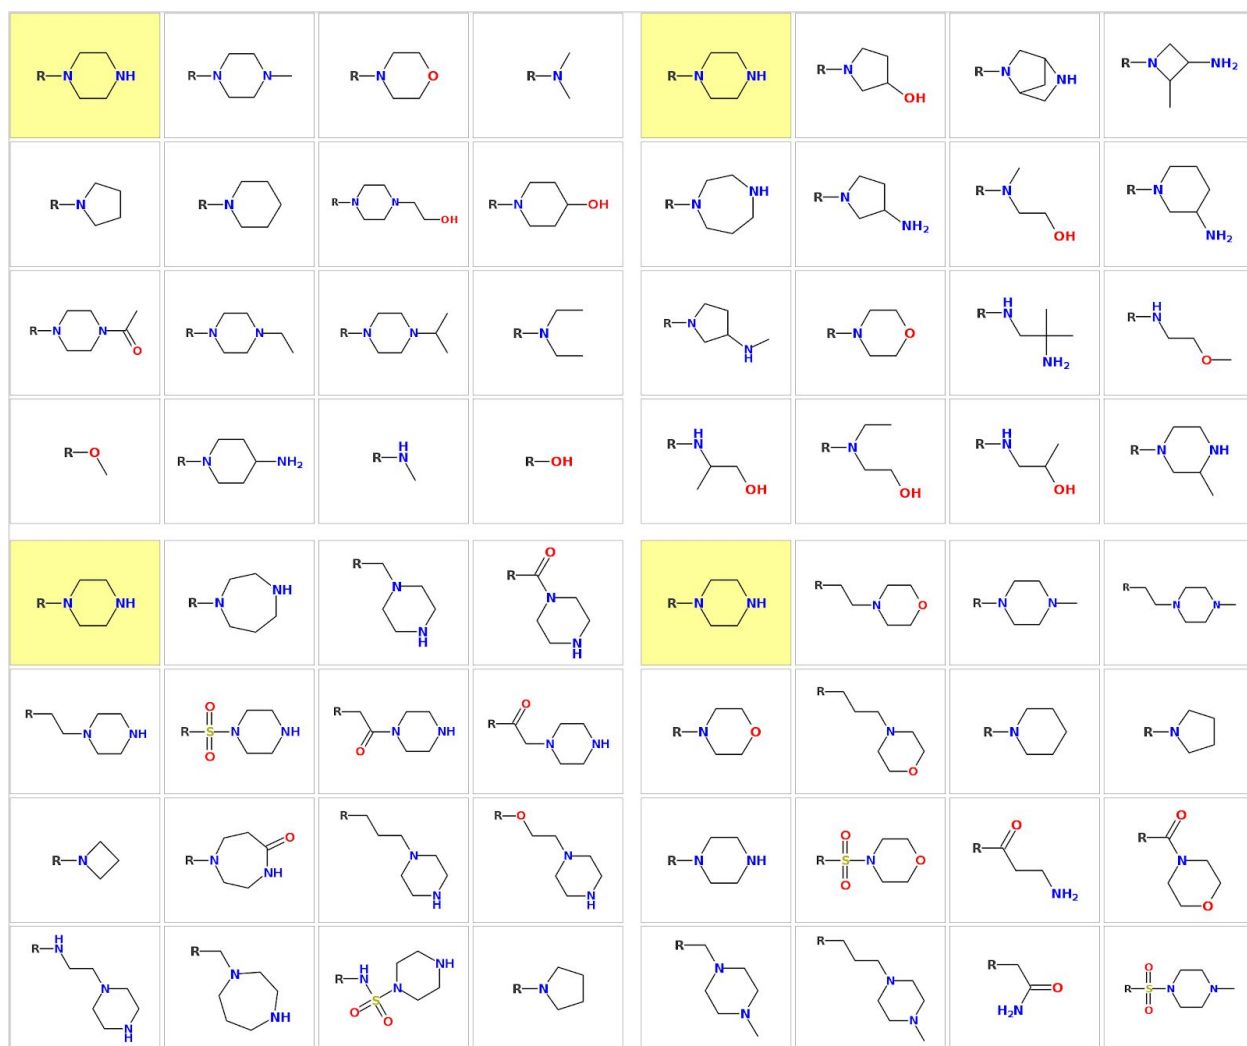

Supplement: Supplementary file 1 [file 23559812]
